# Supplementary material for: The Connection between Czc and Cad Systems Involved in Cadmium Resistance in Pseudomonas putida
Source: MDPI journal article supplement (doi:10.3390/ijms22189697), 2021-09-08
Supplement: s1 [file s1]

# Supplementary Materials

## **The connection between Czc and Cad systems involved in cadmium resistance in *Pseudomonas putida***

Huizhong Liu, Yu Zhang, Yingsi Wang, Xiaobao Xie \*, Qingshan Shi \*

Guangdong Provincial Key Laboratory of Microbial Culture Collection and Application, State Key Laboratory of Applied Microbiology Southern China, Institute of Microbiology, Guangdong Academy of Sciences, Guangzhou 510070, China; hzliucn@163.com (H.L.); zhangyu\_1177@163.com (Y.Z.); wongvincy@163.com (Y.W.)

\* Correspondence: xiexb@gdim.cn (X.X.); jigan@gdim.cn (Q.S.)

**Table S1.** The strains and plasmids used in this study.

| Strains and plasmids             | Description                                                                                                                                        | Reference      |
|----------------------------------|----------------------------------------------------------------------------------------------------------------------------------------------------|----------------|
| <b>Strains</b>                   |                                                                                                                                                    |                |
| <i>E. coli</i> S17-1             | <i>RP4</i> , <i>mob</i> <sup>+</sup> , <i>λpir</i> , host for plasmid construction                                                                 | Lab stock      |
| <i>E. coli</i> BL21(DE3)         | <i>F</i> , <i>ompT</i> , <i>hsdS</i> ( <i>rB</i> <sup>-</sup> <i>mB</i> <sup>-</sup> ), <i>gal</i> , <i>dcm</i> (DE3), host for protein expression | Vazyme Biotech |
| <i>P. putida</i> KT2440          | Wild-type <i>Pseudomonas putida</i> KT2440                                                                                                         | [1]            |
| <i>P. putida</i> Δ <i>czcRS3</i> | <i>czcRS3</i> (PP_1437-1438) deletion mutant of KT2440                                                                                             | This study     |
| <i>P. putida</i> Δ <i>cadR</i>   | <i>cadR</i> (PP_5140) deletion mutant of KT2440                                                                                                    | This study     |
| <b>Plasmids</b>                  |                                                                                                                                                    |                |
| pDS3.0                           | Suicide vector, Gm <sup>R</sup> , <i>R6K ori</i> , <i>sacB</i>                                                                                     | [2]            |
| pDS- <i>czcRS3</i>               | Knockout vector for <i>czcRS3</i>                                                                                                                  | This study     |
| pDS- <i>cadR</i>                 | Knockout vector for <i>cadR</i>                                                                                                                    | This study     |
| pBBR1-403                        | Expression vector, Gm <sup>R</sup> , <i>lacI</i> , <i>tac</i> promoter                                                                             | [3]            |
| pB403- <i>czcRS3</i>             | pBBR1-403 carrying complete <i>czcRS3</i>                                                                                                          | This study     |
| pB403- <i>cadR</i>               | pBBR1-403 carrying <i>cadR</i>                                                                                                                     | This study     |
| pBRTZ                            | Reporter vector, Tet <sup>R</sup> , promoter-less <i>lacZ</i>                                                                                      | [4]            |
| pBRTZ- <i>czcD</i>               | pBRTZ carrying the promoter of <i>czcD</i> (PP_0026)                                                                                               | This study     |
| pBRTZ- <i>cadA1</i>              | pBRTZ carrying the promoter of <i>cadA1</i> (PP_0041)                                                                                              | This study     |
| pBRTZ- <i>czcC1</i>              | pBRTZ carrying the promoter of <i>czcC1</i> (PP_0045)                                                                                              | This study     |
| pBRTZ- <i>cadA2</i>              | pBRTZ carrying the promoter of <i>cadA2</i> (PP_0586)                                                                                              | This study     |
| pBRTZ- <i>czcR3</i>              | pBRTZ carrying the promoter of <i>czcR3</i> (PP_1438)                                                                                              | This study     |
| pBRTZ- <i>czcC2</i>              | pBRTZ carrying the promoter of <i>czcC2</i> (PP_2408)                                                                                              | This study     |
| pBRTZ- <i>cadA3</i>              | pBRTZ carrying the promoter of <i>cadA3</i> (PP_5139)                                                                                              | This study     |
| pBRTZ- <i>czcC</i>               | pBRTZ carrying the promoter of <i>czcC</i> (PP_5385)                                                                                               | This study     |
| pET28a                           | Expression vector, Kan <sup>R</sup> , <i>lacI</i> , T7 promoter                                                                                    | Lab stock      |
| pET28a- <i>czcR3</i>             | pBRTZ carrying the encoding sequence of <i>czcR3</i>                                                                                               | This study     |
| pET28a- <i>cadR</i>              | pBRTZ carrying the encoding sequence of <i>cadR</i>                                                                                                | This study     |

**Table S2.** The primers used in this study.

| Primers                          | Sequence (5' to 3')                            |
|----------------------------------|------------------------------------------------|
| Primers for mutant construction  |                                                |
| <i>czcRS3upS</i>                 | AGGTACCGCATGCGATATCGAGCTCATGCAGTCGCTGCTGGTCTT  |
| <i>czcRS3upA</i>                 | CCAGGTCATACGCCTGTTGG                           |
| <i>czcRS3dnS</i>                 | CCAACAGGCGTATGACCTGGGCGCTTGTTTCGAGCGGTTTT      |
| <i>czcRS3dnA</i>                 | TTTGTGGAATTCCCGGGAGAGCTCAAGGTGGCCTGGATGTGGCA   |
| <i>cadRupS</i>                   | AGGTACCGCATGCGATATCGAGCTCACGCCAAGCACGCGGTTGAT  |
| <i>cadRupA</i>                   | CATGGGAATGTTTCGGTATCC GCTCGTAGTAGCGGATGGTTTC   |
| <i>cadRdnS</i>                   | CGGATACCGAACATTCCCATG                          |
| <i>cadRdnA</i>                   | TTTGTGGAATTCCCGGGAGAGCTCGCACGCCGTTCAACCTCACC   |
| Primers for promoter             |                                                |
| <i>czcDpS</i>                    | CACCGCGGTGGCGGCCGCTCTAGAGAGCAATATGATCGCCATGG   |
| <i>czcDpA</i>                    | TGAATGAGATTTAGTCATCTGCAGGCTGCCATGGTCATGATTTG   |
| <i>cadA1pS</i>                   | CACCGCGGTGGCGGCCGCTCTAGATCGTACGTCAGTCGCAGGAC   |
| <i>cadA1pA</i>                   | TGAATGAGATTTAGTCATCTGCAGAGGGCGTTCAAGCAAACCTCT  |
| <i>czcC1pS</i>                   | CACCGCGGTGGCGGCCGCTCTAGA CCGCCAAATACAGTGGTACTT |
| <i>czcC1pA</i>                   | TGAATGAGATTTAGTCATCTGCAGGACATTGCGGTTATACCGGGG  |
| <i>cadA2pS</i>                   | CACCGCGGTGGCGGCCGCTCTAGACCTCCTCAGGTTTTTCACAA   |
| <i>cadA2pA</i>                   | TGAATGAGATTTAGTCATCTGCAGCAGGTCGTATGTGGTGGATGC  |
| <i>czcR3pS</i>                   | CACCGCGGTGGCGGCCGCTCTAGACCACCTCACGCGCCTTCTC    |
| <i>czcR3pA</i>                   | TGAATGAGATTTAGTCATCTGCAGGGTACGCAGCTCGTCCTCG    |
| <i>czcC2pS</i>                   | CACCGCGGTGGCGGCCGCTCTAGAGAGGGTTTCGTGGCCGTA     |
| <i>czcC2pA</i>                   | TGAATGAGATTTAGTCATCTGCAGGAAACAGTCCTCTGGGCGAA   |
| <i>cadA3pS</i>                   | CACCGCGGTGGCGGCCGCTCTAGAAAGGTCAGCCGCTCCACAT    |
| <i>cadA3pA</i>                   | TGAATGAGATTTAGTCATCTGCAGGTGTTTCGTGGCTGACAGGC   |
| <i>czcCpS</i>                    | CACCGCGGTGGCGGCCGCTCTAGATCGCTTTGGCCTACACTCG    |
| <i>czcCpA</i>                    | TGAATGAGATTTAGTCATCTGCAGCCCTGAATGGGAGCATAGG    |
| Primers for gene cloning         |                                                |
| <i>czcRS3oeS</i>                 | ATTTACACAGGAAACAGAATTCATGCGCCTACTGATCATCGAG    |
| <i>czcRS3oeA</i>                 | GATCCGCCAAAACAGCCAAGCTTTTATGCCGATGCCGAAACC     |
| <i>cadRoeS</i>                   | ATTTACACAGGAAACAGAATTCATGAAGATCGGAGAACTGGCC    |
| <i>cadRoeA</i>                   | GATCCGCCAAAACAGCCAAGCTT CCGATGGCGGTCTGATAGATC  |
| Primers for protein purification |                                                |
| <i>cadRs</i>                     | TTTAAGAAGGAGATATACCATGAAGATCGGAGAACTGGCC       |
| <i>cadRa</i>                     | GTGGTGGTGGTGGTGTCTCGAGATGCCCCGTGACTCCGCCCC     |
| <i>czcR3s</i>                    | ACTTTAAGAAGGAGATATACCATGCGCCTACTGATCATCGAG     |
| <i>czcR3a</i>                    | TGGTGGTGGTGGTGGTGTCTCGAGAAGGCGAGCCTCAAGTACGTA  |
| Primers for FAM-tagged probe     |                                                |
| M13F-fam                         | TGTAAAACGACGGCCAGT (5' end contains 6-FAM tag) |
| M13F- <i>czcC1pS</i>             | TGTAAAACGACGGCCAGT GTATCGAAATCATCGTGTC         |
| <i>czcC1pA2</i>                  | TGCGGTTATACCGGGGCAC                            |
| M13F- <i>czcC2pS</i>             | TGTAAAACGACGGCCAGT GATTATCGAACTTATTGGGC        |
| <i>czcC2pA2</i>                  | AGCATTGGCCAGGGACTGTA                           |
| M13F- <i>czcR3pS</i>             | TGTAAAACGACGGCCAGTTACAGGCGCGGGTTTACTCG         |
| <i>czcR3pA2</i>                  | CATGGGGGGCTCGGTATGT                            |
| <i>czcR3p-mS</i>                 | TTGGGGCGCTTGACAAAGATGTCACTACAAAGTCAAGAATCGTC   |
| <i>czcR3p-mA</i>                 | GACGATTCTTGACTTTGTAGTGACATCTTTGTCAAGCGCCCCAA   |
| Primers for 5'-RACE              |                                                |
| <i>czcRS3-RC</i>                 | TCGACCACGTAACCGTTCTCGCGAA                      |
| TSO-DNA                          | AAGCAGTGGTATCAACGCAGAGTACGCGGG                 |
| TSO-RNA                          | AAGCAGUGGUAUCAACGCAGAGUACGCGGG (oligo RNA)     |

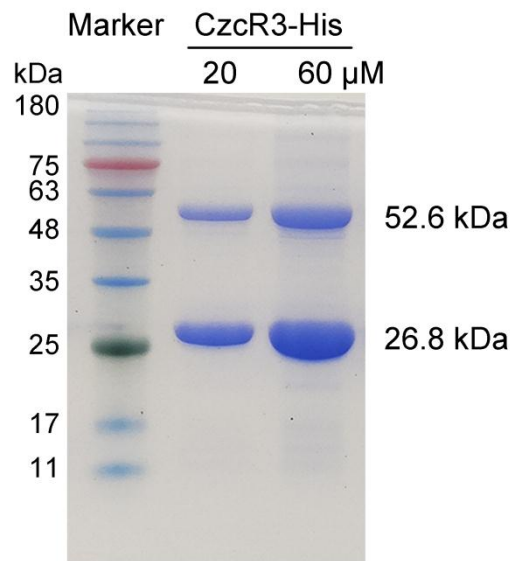

**Figure S1.** CzcR3 forms a homodimer *in vitro*. The purified His-tagged CzcR3 was diluted to 20 and 60  $\mu\text{M}$ , and then mixed with an equal volume of loading buffer (250 mM Tris-HCl at pH 6.8, 2% SDS, 0.1% bromophenol blue, 20% glycerol, without dithiothreitol (DTT) or  $\beta$ -mercaptoethanol). 20  $\mu\text{l}$  of the sample was electrophoresed in SDS-polyacrylamide gel (SDS-PAGE), and the gel was stained with coomassie brilliant blue. The molecular weight of CzcR3-His monomer is about 26.8 kDa, and that of CzcR3-His homodimer is about 53.6 kDa.

## References

1. Bagdasarian, M.; Lurz, R.; Ruckert, B.; Franklin, F.C.H.; Bagdasarian, M.M.; Frey, J.; Timmis, K.N. Specific-purpose plasmid cloning vectors. II. Broad host range, high copy number, RSF1010-derived vectors, and a host-vector system for gene cloning in *Pseudomonas*. *Gene* **1981**, *16*, 237-247.
2. Gao, W.; Liu, Y.; Giometti, C.S.; Tollaksen, S.L.; Khare, T.; Wu, L.; Klingeman, D.M.; Fields, M.W.; Zhou, J. Knock-out of SO1377 gene, which encodes the member of a conserved hypothetical bacterial protein family COG2268, results in alteration of iron metabolism, increased spontaneous mutation and hydrogen peroxide sensitivity in *Shewanella oneidensis* MR-1. *BMC Genomics* **2006**, *7*, 76.
3. Nie, H.L.; Xiao, Y.J.; Liu, H.Z.; He, J.Z.; Chen, W.L.; Huang, Q.Y. FleN and FleQ play a synergistic role in regulating *lapA* and *bcs* operons in *Pseudomonas putida* KT2440. *Env. Microbiol. Rep.* **2017**, *9*, 571-580.
4. Liu, H.Z.; Xiao, Y.J.; Nie, H.L.; Huang, Q.Y.; Chen, W.L. Influence of (p)ppGpp on biofilm regulation in *Pseudomonas putida* KT2440. *Microbiol. Res.* **2017**, *204*, 1-8.
